# Supplementary material
Source: PubMed Central journal article supplement (PMC3280494)
Supplement: 97320630007276S1.pdf [file 97320630007276S1.pdf]

## Supplementary material:

**Table 1:** Status of dispersed SINEs in rice genome:

| SINE ELEMENTS |       |         |         |       |       |
|---------------|-------|---------|---------|-------|-------|
| Name          | Total | BOTH OK | BOTH TR | 5' OK | 3' OK |
| SINE03_OS     | 7514  | 10      | 7072    | 349   | 83    |
| CASINE        | 479   | 1       | 299     | 143   | 36    |
| F524          | 766   | 119     | 295     | 121   | 231   |
| SINE1OS       | 392   | 2       | 168     | 217   | 5     |
| SINE1R5_OS    | 578   | 16      | 416     | 71    | 75    |
| SINE9_OS      | 1207  | 44      | 816     | 215   | 132   |
| SINE16_OS     | 489   | 21      | 236     | 29    | 202   |
| ORMOSIA       | 228   | 27      | 54      | 11    | 136   |
| p-SINE1_OS1   | 612   | 0       | 599     | 5     | 8     |
| SINE6_OS      | 472   | 18      | 123     | 6     | 325   |
| SINE8_OS      | 138   | 20      | 19      | 15    | 84    |
| p-SINE1_OS    | 612   | 0       | 598     | 14    | 0     |
| TOTAL         | 13487 | 278     | 10695   | 1196  | 1317  |

**Table 2:** Status of dispersed LINEs in rice genome:

| LINE ELEMENTS |       |         |         |       |       |
|---------------|-------|---------|---------|-------|-------|
| Name          | Total | BOTH OK | BOTH TR | 5' OK | 3' OK |
| LINE-5        | 192   | 17      | 97      | 69    | 9     |
| LINE5A        | 247   | 17      | 154     | 14    | 62    |
| LINE-3        | 556   | 0       | 514     | 39    | 3     |
| LINE-1        | 330   | 1       | 304     | 5     | 20    |
| OSLINE1_1     | 20    | 1       | 19      | 0     | 0     |
| LINE-7_OS     | 30    | 1       | 16      | 0     | 13    |
| LINE-6_OS     | 185   | 2       | 137     | 0     | 46    |
| TOTAL         | 1560  | 39      | 1241    | 127   | 153   |

**Table 3:** The nucleotide percentage in upstream sequences to the insertion site of SINEs in rice genome:

| Retroelement Type | Thymine (T) | Cytosine (C) | Adenine (A) | Guanine (G) |
|-------------------|-------------|--------------|-------------|-------------|
| LINEs             | 13.6 %      | 17.5 %       | 45.8 %      | 23.1 %      |
| SINEs             | 30.9 %      | 17.3%        | 32.1%       | 19.7%       |
